# Supplementary material for: Impacts of elevated anthropogenic emissions on physicochemical characteristics of BC-containing particles over the Tibetan Plateau
Source: Copernicus journal article supplement (doi:10.5194/egusphere-2024-879), 2024-04-08
Supplement: Supplementary file 1 [file egusphere-2024-879-supplement.pdf]

# Supplement Information - Impacts of elevated anthropogenic emissions on physicochemical characteristics of BC-containing particles over the Tibetan Plateau

Jinbo Wang<sup>1,2</sup>, Jiaping Wang<sup>1,2,3\*</sup>, Yuxuan Zhang<sup>1,2,3,4</sup>, Tengyu Liu<sup>1,2,3</sup>, Xuguang Chi<sup>1,2,3</sup>, Xin Huang<sup>1,2</sup>,  
5 Dafeng Ge<sup>1,2</sup>, Shiyi Lai<sup>1,2</sup>, Caijun Zhu<sup>1,2</sup>, Lei Wang<sup>1,2,3</sup>, Qiaozhi Zha<sup>1,2,3</sup>, Ximeng Qi<sup>1,2,3</sup>, Wei Nie<sup>1,2,3</sup>,  
Congbin Fu<sup>1,2,3</sup> and Aijun Ding<sup>1,2,3</sup>

<sup>1</sup>Joint International Research Laboratory of Atmospheric and Earth System Sciences, School of Atmospheric Sciences, Nanjing University, Nanjing, 210023, China.

<sup>2</sup>Jiangsu Provincial Collaborative Innovation Center of Climate Change, Nanjing, 210023, China.

10 <sup>3</sup>National Observation and Research Station for Atmospheric Processes and Environmental Change in Yangtze River Delta, Nanjing, 210023, China.

<sup>4</sup>Key Laboratory of Atmospheric Environment and Extreme Meteorology, Institute of Atmospheric Physics, Chinese Academy of Sciences, Beijing, 100029, China.

*Correspondence to:* Jiaping Wang (wangjp@nju.edu.cn)

## 15 S1 Model configuration

**Table S1. WRF-Chem model configuration options and settings**

| <b>Domain setting</b>        |               |
|------------------------------|---------------|
| Horizontal grid              | 160 × 180     |
| Grid spacing                 | 20 km × 20 km |
| Vertical layers              | 30 eta levels |
| <b>Configuration options</b> |               |
| Long-wave radiation          | RRTMG         |
| Short-wave radiation         | RRTMG         |
| Cumulus parameterization     | Grell–Deveny  |
| Land-surface                 | Noah          |
| PBL                          | YSU           |
| Microphysics                 | Lin et al.    |
| photolysis                   | Fast-J        |
| Gas chemistry                | CBMZ          |
| Aerosol chemistry            | MOSAIC        |

## S2 Intercomparison of $b_{\text{abs}}$ from different methods

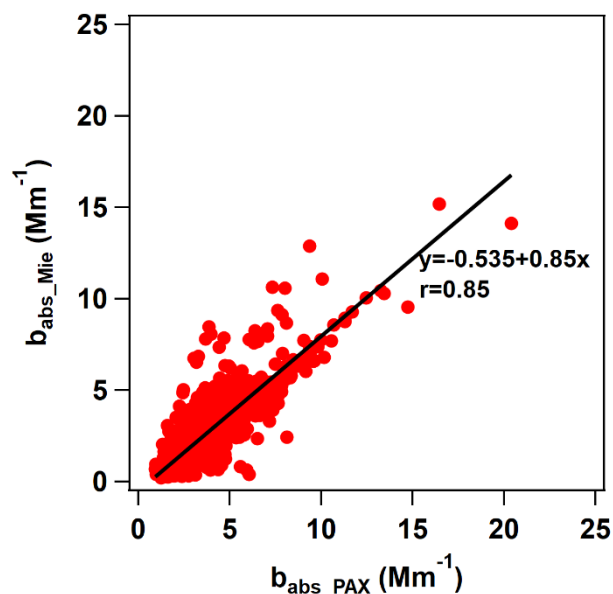

- 20 **Figure S1: The scatter plot, correlation coefficient and linear regression result of the aerosol light absorption coefficients ( $b_{\text{abs}}$ ) at 550 nm wavelength from different methods. The value of x-axis is the  $b_{\text{abs}}$  measured by the photoacoustic extinctions (PAX), and the value of y-axis is the  $b_{\text{abs}}$  calculated by Mie theory. The  $r$  is Pearson correlation coefficient in the plot.**

The more aged black carbon (BC)-containing particles ( $\text{PM}_{\text{BC}}$ ) can transport from other regions to Tibet Plateau (Chen et al., 2019). The long-range transport reduces differences in the amount of coating between different BC particles (Cappa et al., 2019). So, it is reasonable that using Mie theory (Mätzler., 2002) to calculate optical parameters of  $\text{PM}_{\text{BC}}$  in Xihai and Lulang. Moreover, the  $b_{\text{abs}}$  acquired by the Mie theoretical calculations and PAX measurement is very close, and has higher correlation ( $r=0.85$ ).

### S3 Time series of organic PMF factors

(a)

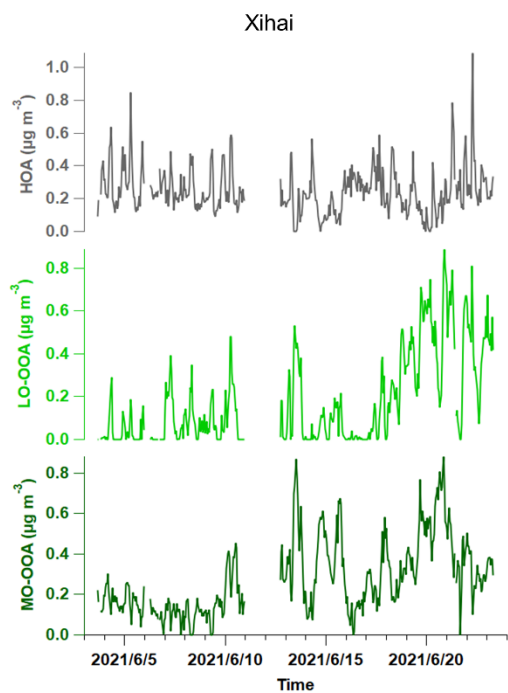

(b)

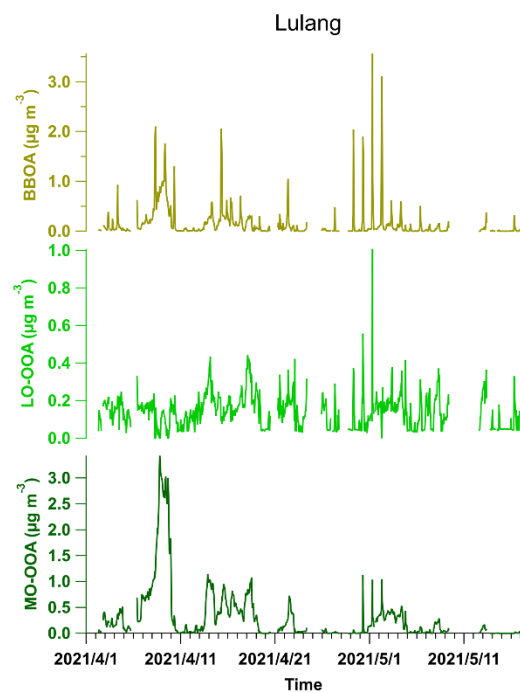

30

**Figure S2: The time series of mass concentration of different organic aerosol factors identified by positive matrix factorization (PMF) in (a) Xihai and (b) Lulang.**

## S4 Diurnal variation of meteorological factors and Ozone (O<sub>3</sub>)

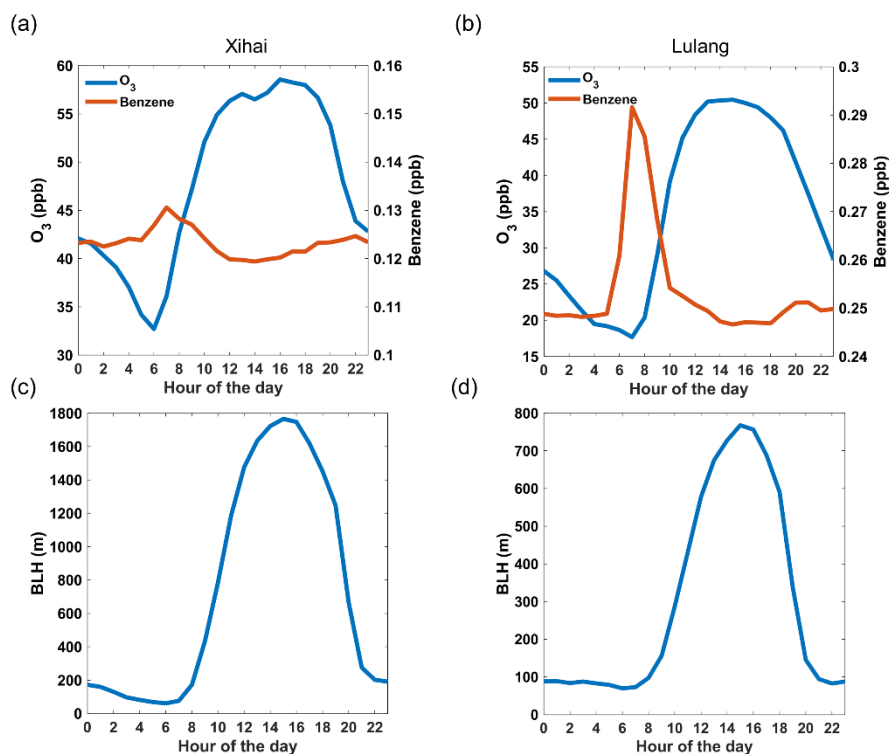

35 **Figure S3: The diurnal variation of ozone (O<sub>3</sub>), benzene and boundary layer height (BLH) in Xihai (a,c) and Lulang (b,d).**

As the Fig. S3 shows, the O<sub>3</sub> and the benzene did not increase significantly after 3:00 p.m. in Xihai (Fig. S3), indicating that the secondary formation and pollutant emission were relatively stable without strong enhancement. In the afternoon, the boundary layer height was also high in Xihai. It means that the atmospheric diffusion conditions were good but the PM<sub>BC</sub> at the surface can be elevated to higher altitudes, facilitating pollutant transport. Summarily, not secondary formation, emissions, rather pollutant transport caused that PM<sub>BC</sub> increased after 3:00 p.m. in Xihai.

40

## References

- Cappa, C. D., Zhang, X. L., Russell, L. M., Collier, S., Lee, A. K. Y., Chen, C. L., Betha, R., Chen, S. J., Liu, J., Price, D. J., Sanchez, K. J., McMeeking, G. R., Williams, L. R., Onasch, T. B., Worsnop, D. R., Abbatt, J., and Zhang, Q.: Light Absorption by Ambient Black and Brown Carbon and its Dependence on Black Carbon Coating State for Two California, USA, Cities in Winter and Summer, *Journal of Geophysical Research-Atmospheres*, 124, 1550-1577, 10.1029/2018jd029501, 2019.
- 45
- Chen, P. F., Kang, S. C., Li, C. L., Zhang, Q. G., Guo, J. M., Tripathee, L., Zhang, Y. A., Li, G., Gul, C., Cong, Z. Y., Wan, X., Niu, H. W., Panday, A. K., Rupakheti, M., and Ji, Z. M.: Carbonaceous aerosol characteristics on the Third Pole: A primary study based on the Atmospheric Pollution and Cryospheric Change (APCC) network, *Environmental Pollution*, 253, 49-60, 10.1016/j.envpol.2019.06.112, 2019.
- 50

Mätzler, C.: MATLAB functions for Mie scattering and absorption, version 2, IAP Res. Rep, 8, University of Bern, Bern, Switzerland, 2002.
